# Supplementary material for: Democracy and Conflict: Evidence from the New York Times
Source: Research Square preprint supplement (doi:10.21203/rs.3.rs-6798154/v1), 2025-06-13
Supplement: Supplementary file 1 [file 5723081aa96da1d8bc1f0407.docx]

**Appendix**

| **Table A1** Variables definition and Data Sources | | | |
| --- | --- | --- | --- |
|  | Variable | Meaning | Data Sources |
| Dependent Variables | conflict | Country-year counts based on conflict events reported by The New York Times. | Scott et al.(2020)[[1]](#footnote-0), downloaded from: <https://doi.org/10.13012/B2IDB-0647142_V3> |
| Explanatory  Variables | Democracy | Country-year data to measure a country is democracy or not | Boix et al. (2013)[[2]](#footnote-1), Boix et al. (2022)[[3]](#footnote-2)，downloaded from: <https://sites.google.com/site/mkmtwo/data?authuser=0> |
| demACRR | Country-year data to measure a country is democracy or not | Acemoglu et al.(2019)[[4]](#footnote-3), downloaded from: <https://economics.mit.edu/people/faculty/daron-acemoglu/data-archive> |
| demGK | Country-year data to measure a country is democracy or not | Gründler & Krieger(2021)[[5]](#footnote-4), data from: Ciccone & Ismailov (2022) |
| bi_geddes | Country-year data to measure a country is democracy or not | Geddes et al.(2014)[[6]](#footnote-5), data from: Ciccone & Ismailov (2022) |
| pc_dem | Country-year data to measure a country is democracy or not | Miller(2015b)[[7]](#footnote-6), downloaded from: <https://sites.google.com/site/mkmtwo/data?authuser=0> |
| e_chga_demo | Country-year data to measure a country is democracy or not | Cheibub et al. (2010)[[8]](#footnote-7) downloaded from: <https://sites.google.com/site/joseantoniocheibub/datasets/dd?authuser=0> |
| DDGeddesDemU | Country-year data to measure a country is democracy or not | Przeworski et al.(2000)[[9]](#footnote-8),downloaded from: https://sites.google.com/site/joseantoniocheibub/datasets/aclp?authuser=0 |
| Instrument  Variables | Democratic wave | regional waves of democratization | We restructured it based on the method proposed by Acemoglu (2019). |
| Control  Variables | lngdp | Logged GDP per capita | Fariss et al.(2021)[[10]](#footnote-9), downloaded from: <https://dataverse.harvard.edu/dataset.xhtml?persistentId=doi:10.7910/DVN/DC0ING> |
| lnpop | Logged population | Fariss et al.(2021), downloaded from: <https://dataverse.harvard.edu/dataset.xhtml?persistentId=doi:10.7910/DVN/DC0ING> |
| lnimports | Logged total imports in 2014 US millions of dollars. | Barbieri et al. (2009)[[11]](#footnote-10), Barbieri and Keshk (2016)[[12]](#footnote-11), downloaded from: <https://correlatesofwar.org/> |
| lnexports | Logged total exports in 2014 US millions of dollars. | Barbieri et al. (2009), Barbieri and Keshk (2016), downloaded from: <https://correlatesofwar.org/> |
| lnpechmor | Logged Child mortality rate | Gapminder (2018), ‘Data in Gapminder World’, downloaded from: <https://www.gapminder.org/data/> |
| lnpelifeex | Logged Life expectancy | Gapminder (2018), ‘Data in Gapminder World’, downloaded from: <https://www.gapminder.org/data/> |
| precip_gpcc | average annual rainfall within a Country’s territory. | Ciccone & Ismailov (2022)[[13]](#footnote-12), downloaded from: [https://www.vwl.uni-mannheim.de/en/ciccone/#c39878](https://www.vwl.uni-mannheim.de/en/ciccone/" \l "c39878) |
| temp_cru | average temperature within a Country’s territory. | Ciccone & Ismailov (2022), downloaded from: [https://www.vwl.uni-mannheim.de/en/ciccone/#c39878](https://www.vwl.uni-mannheim.de/en/ciccone/" \l "c39878) |
| warhist | War history | Vogt et al. (2015)[[14]](#footnote-13), downloaded from: <https://growup.ethz.ch/> |
| Armed1 | extrasystemic (between a state and a non-state group outside its own territory) | Gleditsch(2002),[[15]](#footnote-14) Davies et al.(2024)[[16]](#footnote-15) UCDP,downloaded from: <https://ucdp.uu.se/downloads/> , 后经自己手动整理 |
| Armed2 | interstate (both sides are states in the Gleditsch and Ward membership system). | Same as above. |
| Armed3 | intrastate (rebel groups; no involvement  of foreign governments ) | Same as above. |
| Armed4 | internationalized intrastate(rebel groups; foreign governments involved) | Same as above. |
| Mechanisms  Variables | government accountability | To what extent is the ideal of government accountability achieved? Scale: Interval, from low to high (0-1). | Lührmann et al. (2020); V-Dem Codebook (Coppedge et al.; 2024)[[17]](#footnote-16) |
| Impartial public administration | the extent to which public officials generally abide by the  law and treat like cases alike, or conversely, the extent to which public administration is  characterized by arbitrariness and biases | Pemstein et al. (2023, V-Dem Working Paper Series 2023:21); V-Dem Codebook (Coppedge et al.; 2024)[[18]](#footnote-17) |
| Legal equality and individual liberty | Equality before the law and individual liberty index. Scale: Interval, from low to high (0-1). | Pemstein et al. (2023, V-Dem Working Paper Series 2023:21); V-Dem Codebook (Coppedge et al.; 2024) |
| Public welfare | How many welfare programs are means-tested and how many benefit all (or virtually  all) members of the polity? Scale: Ordinal, converted to interval by the measurement model. | Pemstein et al. (2023, V-Dem Working Paper Series 2023:21); V-Dem Codebook (Coppedge et al.; 2024) |
| Fisical capacity | On which of the following sources of revenue does the central government primarily rely to finance its activities?Ordinal(0-4) | Pemstein et al. (2023, V-Dem Working Paper Series 2023:21); V-Dem Codebook (Coppedge et al.; 2024) |
| Performance legitimacy | To what extent does the government refer to performance (such as providing economic growth, poverty reduction, effective and non-corrupt governance, and/or providing security) in order to justify the regime in place?Scale: Ordinal, converted to interval by the measurement model. | Tannenberg et al. (2021); Pemstein et al. (2023, V-Dem Working Paper Series 2023:21); V-Dem Codebook (Coppedge et al.; 2024)[[19]](#footnote-18) |
| Procedural legitimacy | To what extent does the current government refer to the legal norms and regulations in  order to justify the regime in place? Scale: Ordinal, converted to interval by the measurement model. | Tannenberg et al. (2021); Pemstein et al. (2023, V-Dem Working Paper Series 2023:21); V-Dem Codebook (Coppedge et al.; 2024). |
| Rule based on personal authority | To what extent is rule based on personal authority? Scale: Interval, from low to high (0-1) | Sigman & Lindberg (2017); Pemstein et al. (2023, V-Dem Working Paper Series 2023:21); V-Dem Codebook (Coppedge et al.; 2024)[[20]](#footnote-19) |

1. Althaus, Scott, Joseph Bajjalieh, John F. Carter, Buddy Peyton, and Dan A. Shalmon. 2020. Cline Center Historical Phoenix Event Data. Cline Center for Advanced Social Research. v1.3.0. May 4. University of Illinois Urbana-Champaign. [↑](#footnote-ref-0)
2. Boix, C., Miller, M. & Rosato, S. (2013), A Complete Data Set of Political Regimes, 1800-2007, Comparative Political Studies 46(12), 1523–1554. [↑](#footnote-ref-1)
3. Boix, C., Miller, M. K. & Rosato, S. (2022), Boix-miller-rosato dichotomous coding of democracy,1800-2020. [↑](#footnote-ref-2)
4. Acemoglu, D., Naidu, S., Restrepo, P. and Robinson, J.A., 2019. Democracy does cause growth. Journal of political economy, 127(1), pp.47-100. [↑](#footnote-ref-3)
5. Gründler, K. and Krieger, T., 2021. Using Machine Learning for measuring democracy: A practitioners guide and a new updated dataset for 186 countries from 1919 to 2019. European Journal of Political Economy, 70, p.102047. [↑](#footnote-ref-4)
6. Geddes, B., Wright, J. and Frantz, E., 2014. Autocratic breakdown and regime transitions: A new data set. Perspectives on politics, 12(2), pp.313-331. [↑](#footnote-ref-5)
7. Miller, M.K., 2015b. Democratic pieces: Autocratic elections and democratic development since 1815. British Journal of Political Science, 45(3), pp.501-530. [↑](#footnote-ref-6)
8. Cheibub, J.A., Gandhi, J. and Vreeland, J.R., 2010. Democracy and dictatorship revisited. Public choice, 143, pp.67-101. [↑](#footnote-ref-7)
9. Przeworski, A., 2000. Democracy and Development: Political Institutions and Well-Being in the World, 1950-1990. Cambridge University Press. [↑](#footnote-ref-8)
10. Fariss, C.J., Anders, T., Markowitz, J.N. and Barnum, M., 2022. New estimates of over 500 years of historic GDP and population data. Journal of Conflict Resolution, 66(3), pp.553-591. [↑](#footnote-ref-9)
11. Barbieri, K., Keshk, O. M. & Polins, B. (2009), ‘Trading Data: Evaluating our Assumptions and Coding Rules’, Conflict Management and Peace Science 26(5), 471–491. [↑](#footnote-ref-10)
12. Barbieri, K. & Keshk, O. M. G. (2016), ‘Correlates of War Project Trade Data Set Codebook, Version4.0.’ [↑](#footnote-ref-11)
13. Ciccone, A. and Ismailov, A., 2022. Rainfall, agricultural output and persistent democratization. Economica, 89(354), pp.229-257. [↑](#footnote-ref-12)
14. Vogt, M., Bormann, N.C., Rüegger, S., Cederman, L.E., Hunziker, P. and Girardin, L., 2015. Integrating data on ethnicity, geography, and conflict: The ethnic power relations data set family. Journal of Conflict Resolution, 59(7), pp.1327-1342. [↑](#footnote-ref-13)
15. Gleditsch, N.P., Wallensteen, P., Eriksson, M., Sollenberg, M. and Strand, H., 2002. Armed conflict 1946-2001: A new dataset. Journal of peace research, 39(5), pp.615-637. [↑](#footnote-ref-14)
16. Davies, S., Engström, G., Pettersson, T. and Öberg, M., 2024. Organized violence 1989–2023, and the prevalence of organized crime groups. Journal of Peace Research, 61(4), pp.673-693. [↑](#footnote-ref-15)
17. Lührmann, A., Marquardt, K. L. & Mechkova, V. (2020), ‘Constraining Governments: New Indices of Vertical, Horizontal, and Diagonal Accountability’, American Political Science Review 114(3), 811820. [↑](#footnote-ref-16)
18. Pemstein, D., Marquardt, K. L., Tzelgov, E., Wang, Y., Medzihorsky, J., Krusell, J., Miri, F. & von Römer, J. (2023), ‘The V-Dem Measurement Model: Latent Variable Analysis for Cross-National and Cross-Temporal Expert-Coded Data’, V-Dem Working Paper Series 2023(21, 8th edition)

    Coppedge, Michael, John Gerring, Carl Henrik Knutsen, Staffan I. Lindberg, Jan Teorell, David Altman, Fabio Angiolillo, Michael Bernhard, Cecilia Borella, Agnes Cornell, M. Steven Fish, Linnea Fox, Lisa Gastaldi, Haakon Gjerløw, Adam Glynn, Ana Good God, Sandra Grahn, Allen Hicken, Katrin Kinzelbach, Kyle L. Marquardt, Kelly McMann, Valeriya Mechkova, Anja Neundorf, Pamela Paxton, Daniel Pemstein, Oskar Rydén, Johannes von Römer, Brigitte Seim, Rachel Sigman, Svend-Erik Skaaning, Jeffrey Staton, Aksel Sundström, Eitan Tzelgov, Luca Uberti, Yi-ting Wang, Tore Wig, and Daniel Ziblatt. 2024. "V-Dem Codebook v14" Varieties of Democracy (V-Dem) Project. [↑](#footnote-ref-17)
19. Tannenberg, M., Bernhard, M., Gerschewski, J., Lührmann, A. & von Soest, C. (2021), ‘Claiming the right to rule: regime legitimation strategies from 1900 to 2019’, European Political Science Review 13(1), 77–94.

    Pemstein, D., Marquardt, K. L., Tzelgov, E., Wang, Y., Medzihorsky, J., Krusell, J., Miri, F. & von Römer, J. (2024), ‘The V-Dem Measurement Model: Latent Variable Analysis for Cross-National

    and Cross-Temporal Expert-Coded Data’, V-Dem Working Paper Series 2024：21.

    URL: https://www.v-dem.net/media/publications/Working_Paper_21.pdf [↑](#footnote-ref-18)
20. Sigman, R. & Lindberg, S. I. (2017), Neopatrimonialism and Democracy: An Empirical Investigation

    of Africa’s Political Regimes, in P. Von Doepp & G. Lynch, eds, ‘Handbook of Democratization in

    Africa’, Routledge, London. [↑](#footnote-ref-19)
